# Supplementary material for: Workplace interpersonal relationships and turnover intentions among care workers in older adult care facilities: a mediation analysis comparing direct and mediated effects via psychological distress
Source: Research Square preprint supplement (doi:10.21203/rs.3.rs-4649906/v1), 2024-08-09
Supplement: Supplementary file 1 [file 239f1bb0e7b78d4119e90531.xlsx]

## Sheet: Table1
	Table 1. Characteristics of respondents
			N		％
	Age
		Mean±S.D. (range)	44.7±12.1 (21—74)
	Sex
		Men	83		32.7
		Women	170		66.9
		Other	1		0.4
	Education
		University/graduate school graduate	33		13
		Vocational school/college graduate	103		40.6
		High school graduate	111		43.7
		Junior high school graduate	7		2.8
	Certified care worker qualifications
		No	57		22.4
		Yes	197		77.6
	Workplace status
		Home services	81		31.9
		Residential services	173		68.1
	Employee status
		Full-time	232		91.3
		Part-time	22		8.7
	Duration of service in the current job
		Mean±S.D. (range)	8.1±7.0 (0—32)
	Duration of care work experience
		Mean±S.D. (range)	11.6±7.6 (0—32)
	Managerial position
		No	178		70.1
		Yes	76		29.9
