# Supplementary material for: Workplace interpersonal relationships and turnover intentions among care workers in older adult care facilities: a mediation analysis comparing direct and mediated effects via psychological distress
Source: Research Square preprint supplement (doi:10.21203/rs.3.rs-4649906/v1), 2024-08-09
Supplement: Supplementary file 2 [file 4f9cb4e85b5be0d840d428d4.xlsx]

## Sheet: 2
	Table 2. Correlations and reliability estimates for study variables (McDonald's omega)
			Mean		SD		1		2		3		4		5		6		7		8		9		10		11		12
	1	Age	44.7		12.1		ー
	2	Duration of service in the current job	8.1		7		0.25	***	ー
	3	Duration of care work experience	11.6		7.6		0.3	***	0.54	***	ー
	4	WIPS (total)	25.8		15.3		-0.07		0		0.16	**	0.96
	5	Insufficient communication	4.4		3		-0.08		-0.03		0.12		0.88	***	0.85
	6	Bullying	3.8		2.9		0.05		-0.13	*	0.09		0.81	***	0.72	***	0.81
	7	Sense of unfair workload	3.8		2.6		-0.13	*	0.02		0.11		0.82	***	0.66	***	0.53	***	0.82
	8	Different attitudes to care work	5.1		3.1		-0.06		0.02		0.21	**	0.91	***	0.78	***	0.67	***	0.73	***	0.87
	9	Difficulty in guidance for subordinates/new staff	4.4		3.1		-0.06		0.11		0.18	**	0.83	***	0.63	***	0.52	***	0.62	***	0.75	***	0.86
	10	Labeling	4.3		3.1		-0.08		-0.01		0.13	*	0.89	***	0.7	***	0.72	***	0.72	***	0.74	***	0.7	***	0.87
	11	K6 scale	6.2		5.8		-0.17	**	-0.05		0.08		0.64	***	0.63	***	0.48	***	0.56	***	0.57	***	0.5	***	0.53	***	0.95
	12	Turnover intention scale	7.9		3.1		-0.3	***	-0.03		-0.08		0.52	***	0.51	***	0.35	***	0.52	***	0.47	***	0.41	***	0.42	***	0.54	***	0.87
	*p<0.05, **p<0.01, ***p<0.001
