# Supplementary material for: Workplace interpersonal relationships and turnover intentions among care workers in older adult care facilities: a mediation analysis comparing direct and mediated effects via psychological distress
Source: Research Square preprint supplement (doi:10.21203/rs.3.rs-4649906/v1), 2024-08-09
Supplement: Supplementary file 3 [file 62342355b427d80d9b6cee6b.xlsx]

## Sheet: Sheet1
	Table 4. Total and direct effects of the subscale of the WIPS on turnover intention and mediation effect of psychological distress
		Point estimate (95% confidence interval)
		Model 1a		Model 2b
	Independent variable: insufficient communication
	Total effect	0.514	(0.405 ― 0.619)	0.514	(0.408 ― 0.614)
	Direct effect	0.284	(0.139 ― 0.425)	0.319	(0.192 ― 0.459)
	Mediation effect	0.229	(0.138 ― 0.329)	0.194	(0.105 ― 0.285)
	Independent variable: bullying
	Total effect	0.354	(0.210 ― 0.466)	0.411	(0.293 ― 0.521)
	Direct effect	0.121	(-0.017 ― 0.241)	0.207	(0.091 ― 0.322)
	Mediation effect	0.232	(0.159 ― 0.318)	0.204	(0.135 ― 0.290)
	Independent variable: sense of unfair workload
	Total effect	0.523	(0.402 ― 0.633)	0.505	(0.383 ― 0.607)
	Direct effect	0.318	(0.166 ― 0.455)	0.314	(0.187 ― 0.443)
	Mediation effect	0.205	(0.125 ― 0.298)	0.19	(0.113 ― 0.268)
	Independent variable: different attitudes to care work
	Total effect	0.467	(0.347 ― 0.585)	0.481	(0.367 ― 0.594)
	Direct effect	0.235	(0.100 ― 0.364)	0.278	(0.140 ― 0.401)
	Mediation effect	0.232	(0.153 ― 0.325)	0.204	(0.128 ― 0.293)
	Independent variable: difficulty in guidance for subordinates/new staff
	Total effect	0.407	(0.290 ― 0.516)	0.426	(0.301 ― 0.538)
	Direct effect	0.179	(0.050 ― 0.307)	0.207	(0.072 ― 0.329)
	Mediation effect	0.227	(0.147 ― 0.331)	0.219	(0.141 ― 0.313)
	Independent variable: labeling
	Total effect	0.421	(0.297 ― 0.558)	0.409	(0.277 ― 0.522)
	Direct effect	0.184	(0.057 ― 0.335)	0.198	(0.073 ― 0.330)
	Mediation effect	0.237	(0.160 ― 0.330)	0.211	(0.143 ― 0.287)
	aNo control on basic attributes.
	bBasic attributes are controlled. (i.e., adjusted for age, sex, education, certified care worker qualifications, workplace status, employee status, duration of service in the current job, duration of care work experience, and managerial position).
