# Supplementary material for: Workplace interpersonal relationships and turnover intentions among care workers in older adult care facilities: a mediation analysis comparing direct and mediated effects via psychological distress
Source: Research Square preprint supplement (doi:10.21203/rs.3.rs-4649906/v1), 2024-08-09
Supplement: Supplementary file 4 [file 63ede020d1397e2b4b82a01c.xlsx]

## Sheet: Sheet1
	Table 3. Total and direct effects of workplace interpersonal problems on turnover intention and mediation effect of psychological distress
		β (95% confidence interval)
		Model 1a		Model 2b
	Total effect	0.52	(0.392 ― 0.624)	0.528	(0.415 ― 0.634)
	Direct effect	0.293	(0.141 ― 0.446)	0.336	(0.194 ― 0.469）
	Mediation effect	0.227	(0.129 ― 0.322)	0.192	(0.104 ― 0.281)
	aNo control on basic attributes.
	bBasic attributes are controlled. (i.e., adjusted for age, sex, education, certified care worker qualifications, workplace status, employee status, duration of service in the current job, duration of care work experience, and managerial position).
